# Supplementary material for: Immunopathological investigation and genetic evolution of Avian leukosis virus Subgroup-J associated with myelocytomatosis in broiler flocks in Egypt
Source: Springer Nature journal article supplement (doi:10.1186/s12985-024-02329-7), 2024-04-10

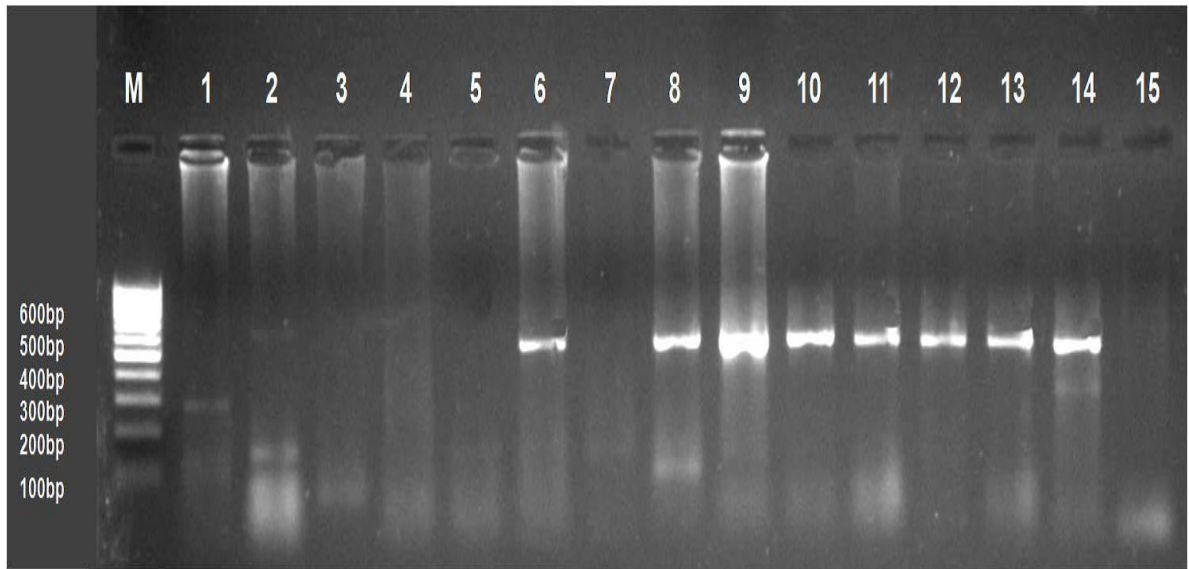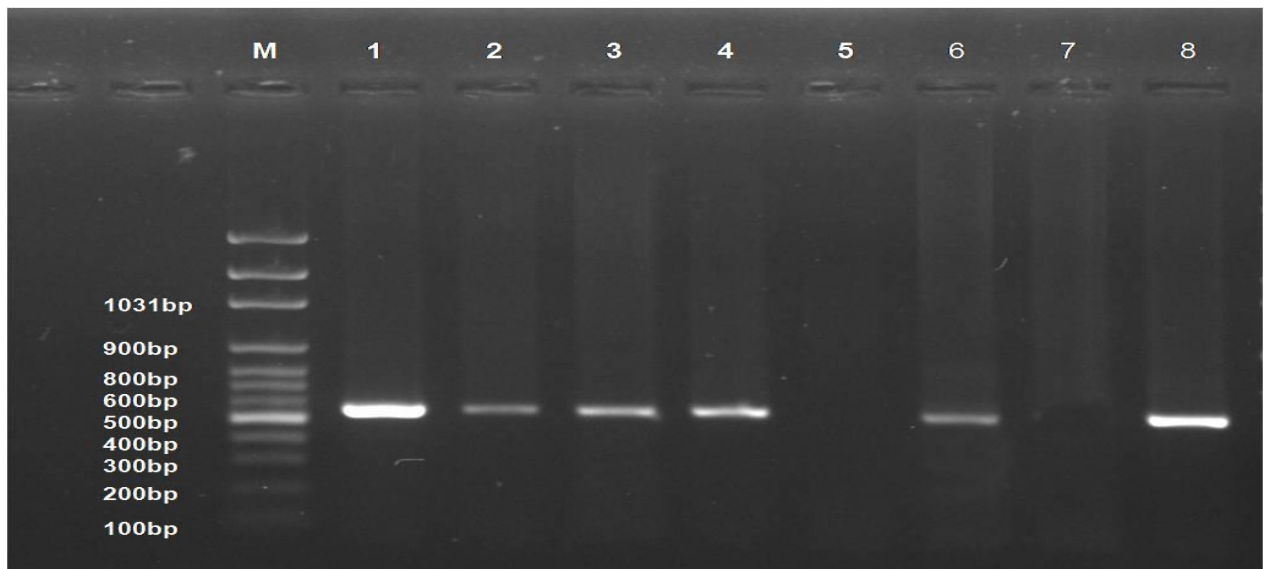

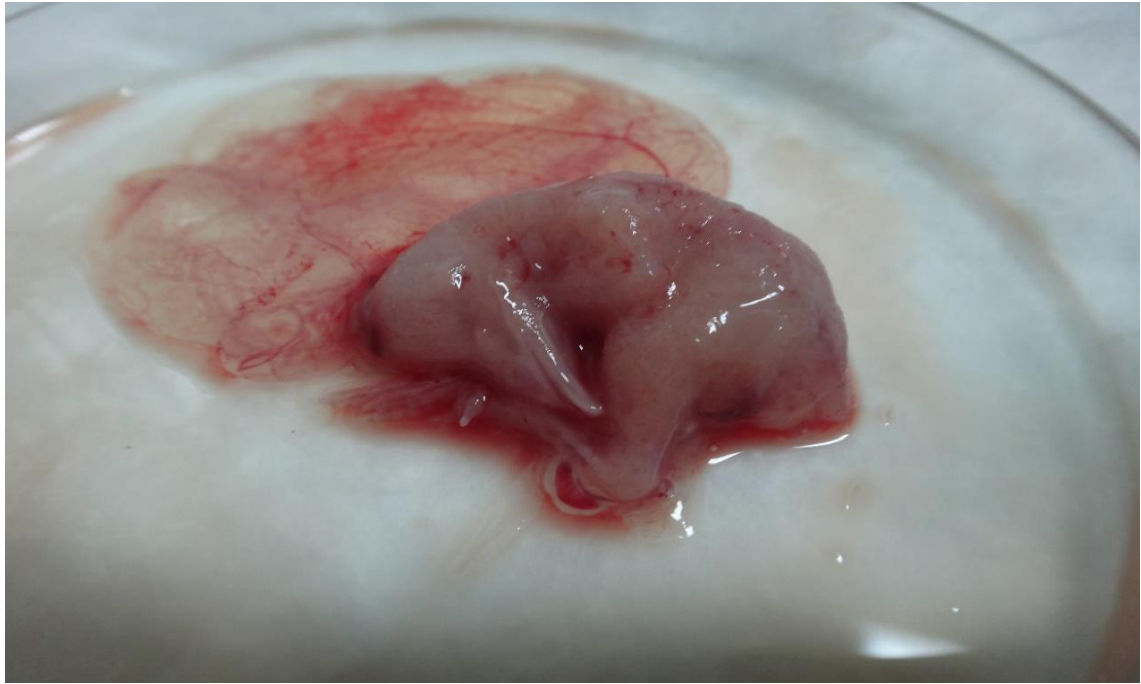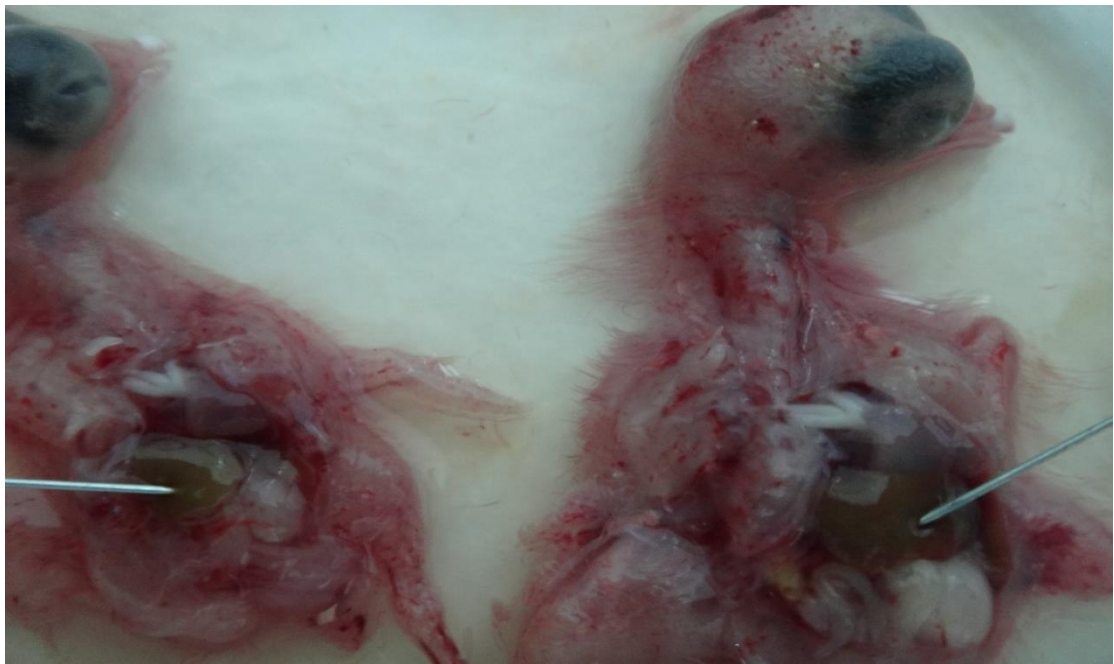

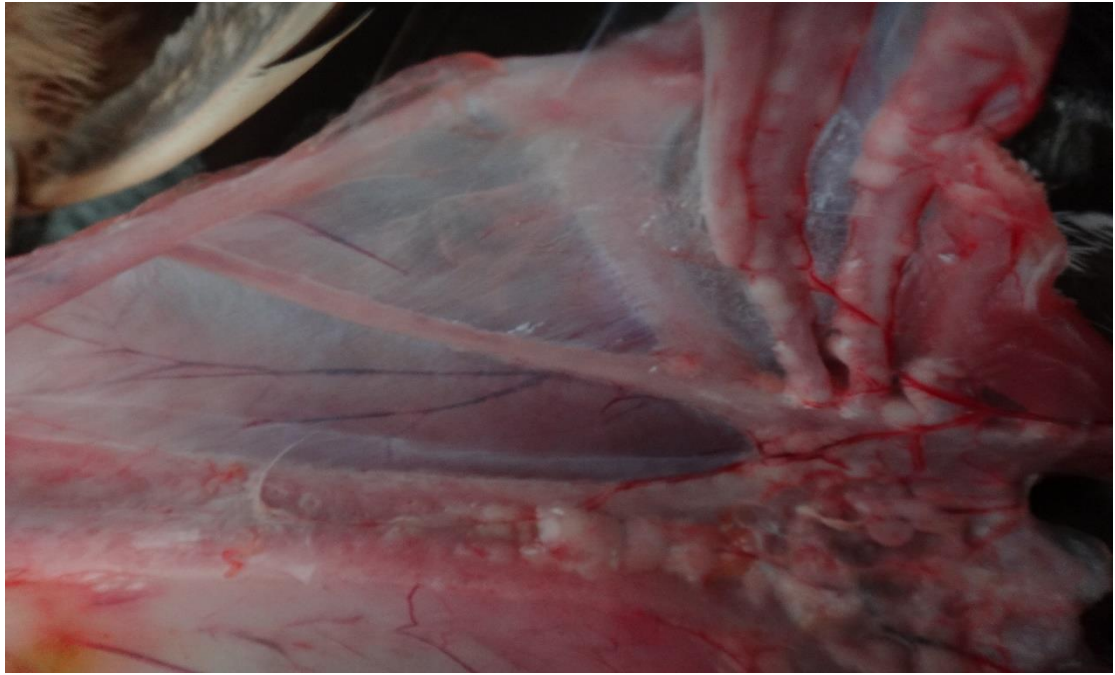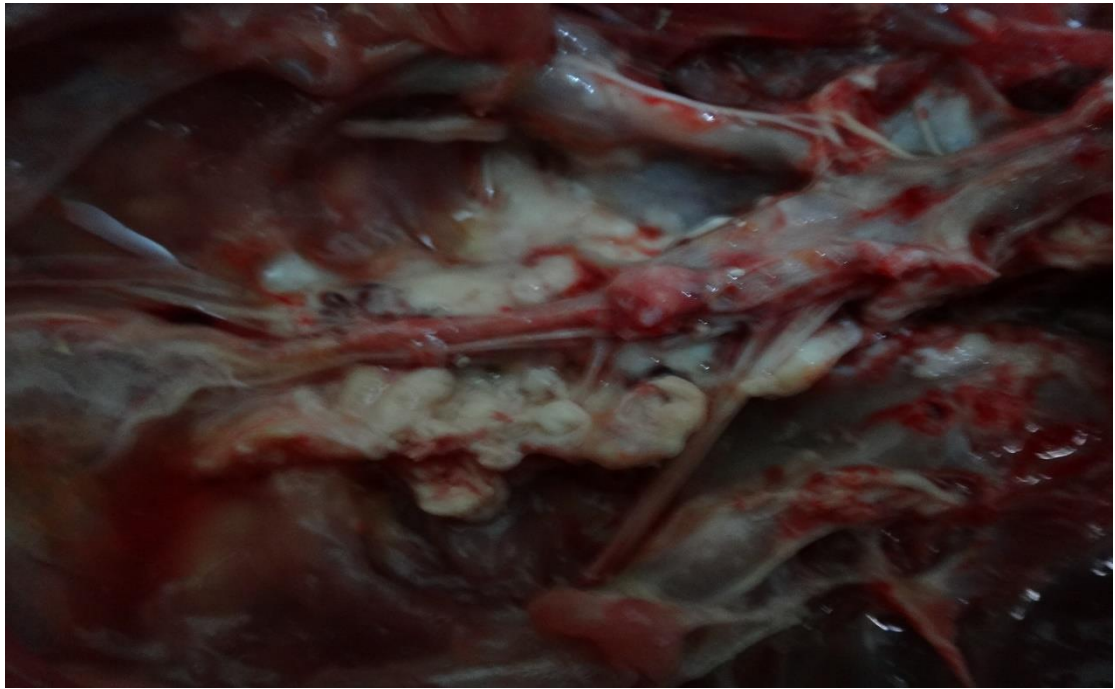



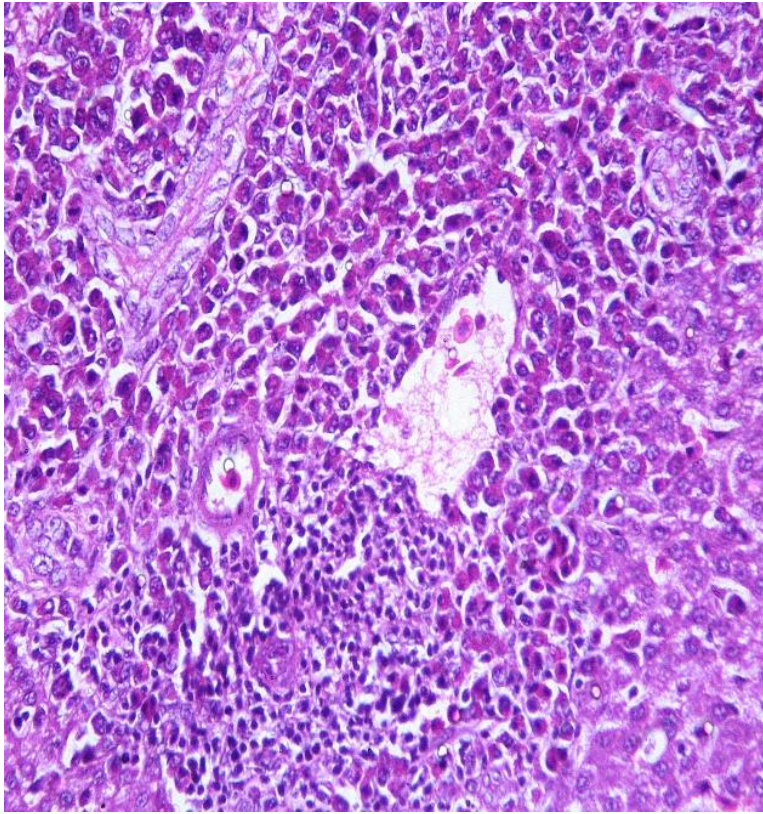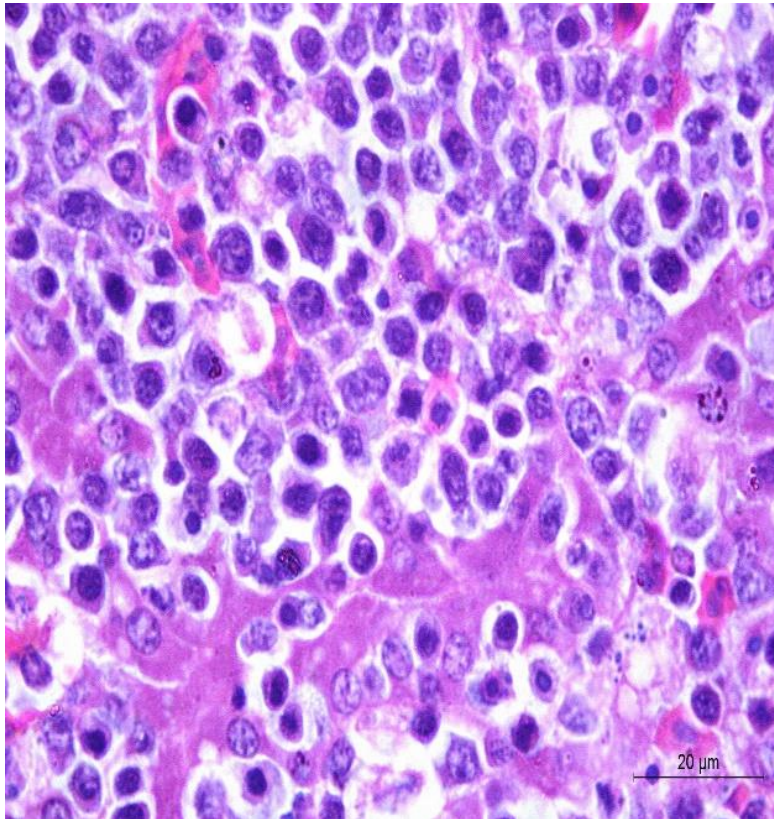



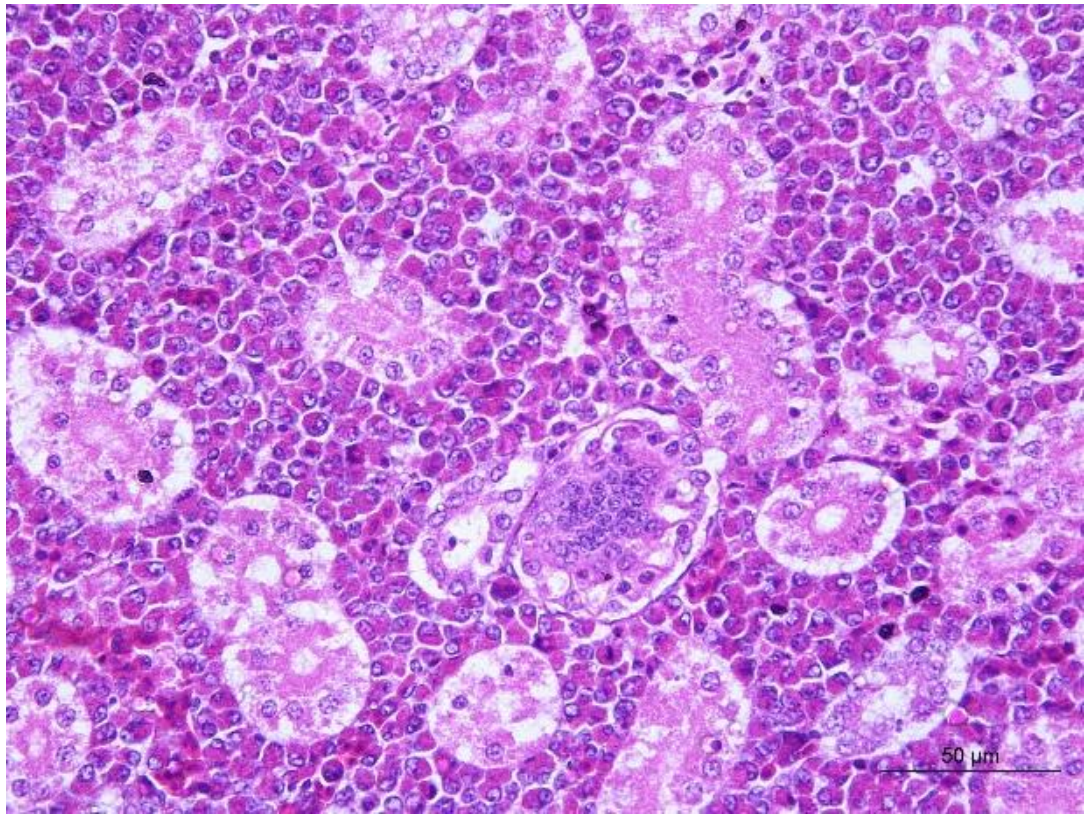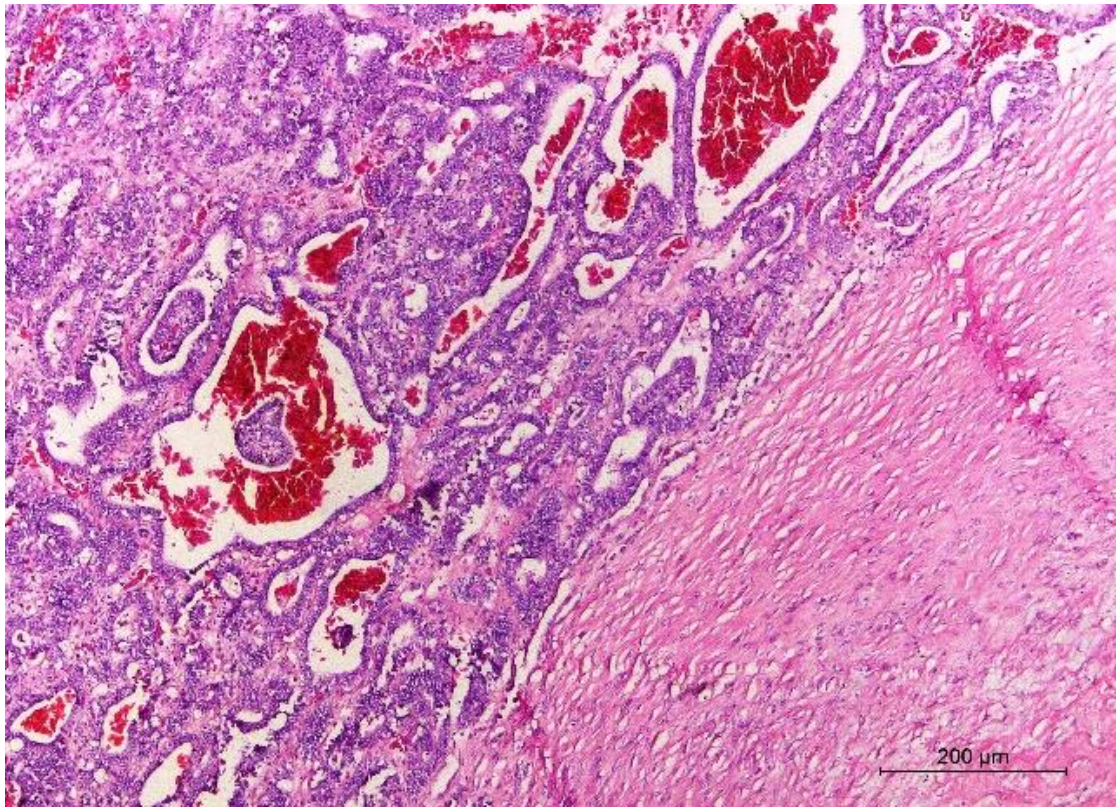



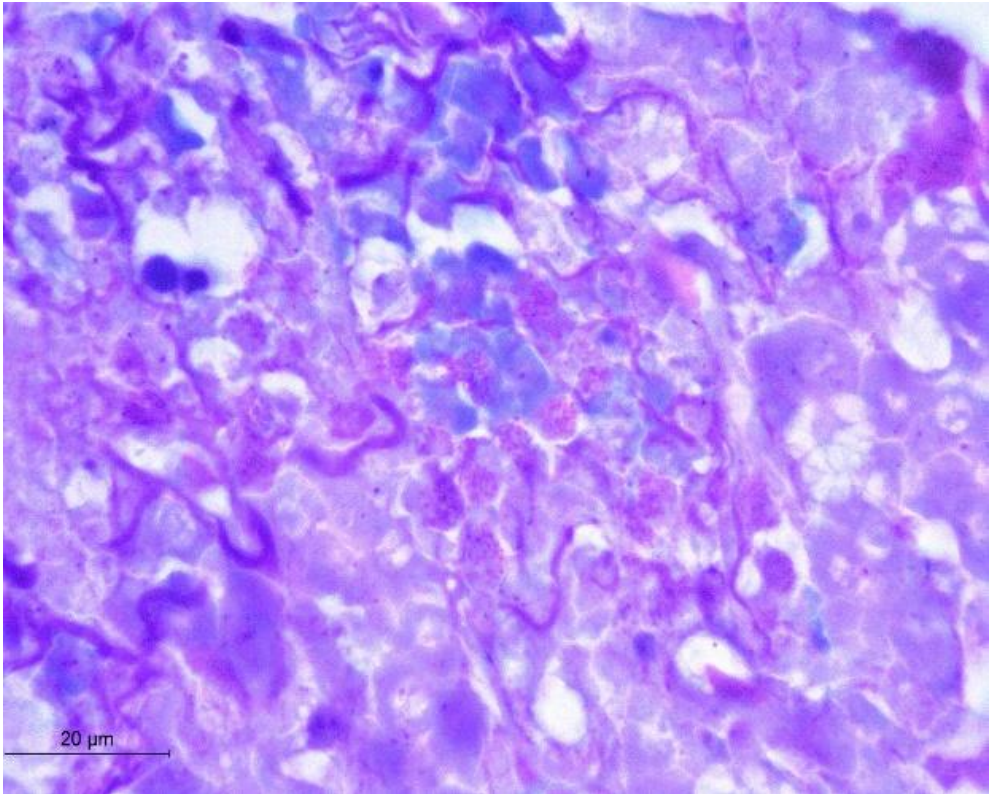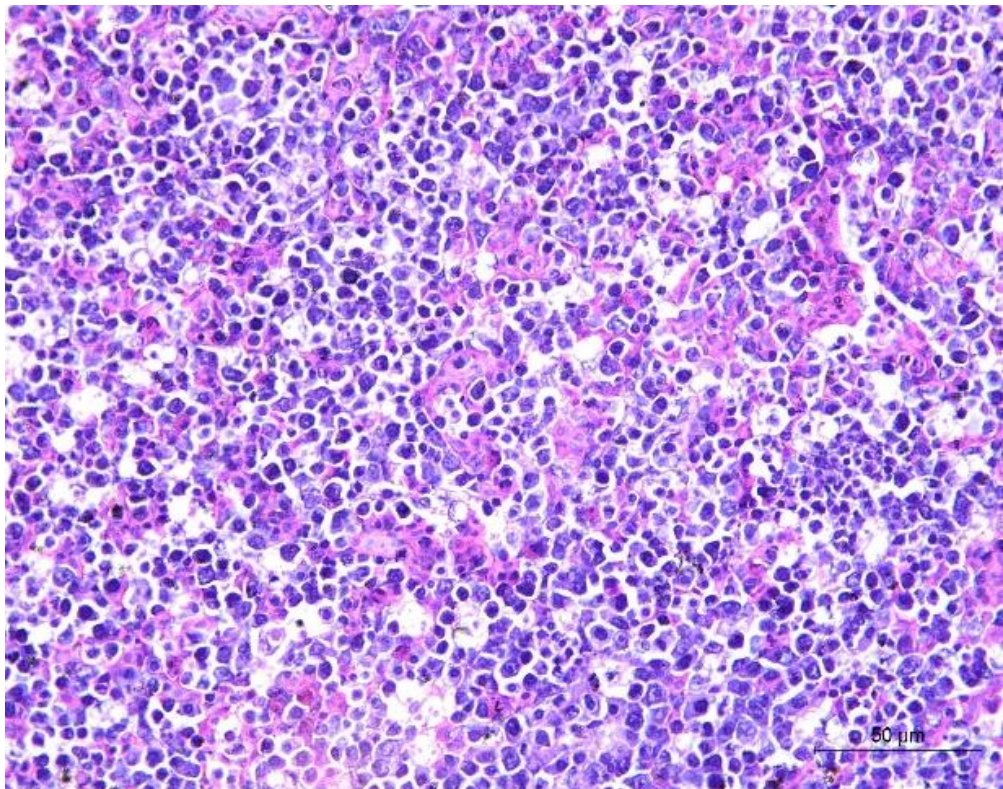



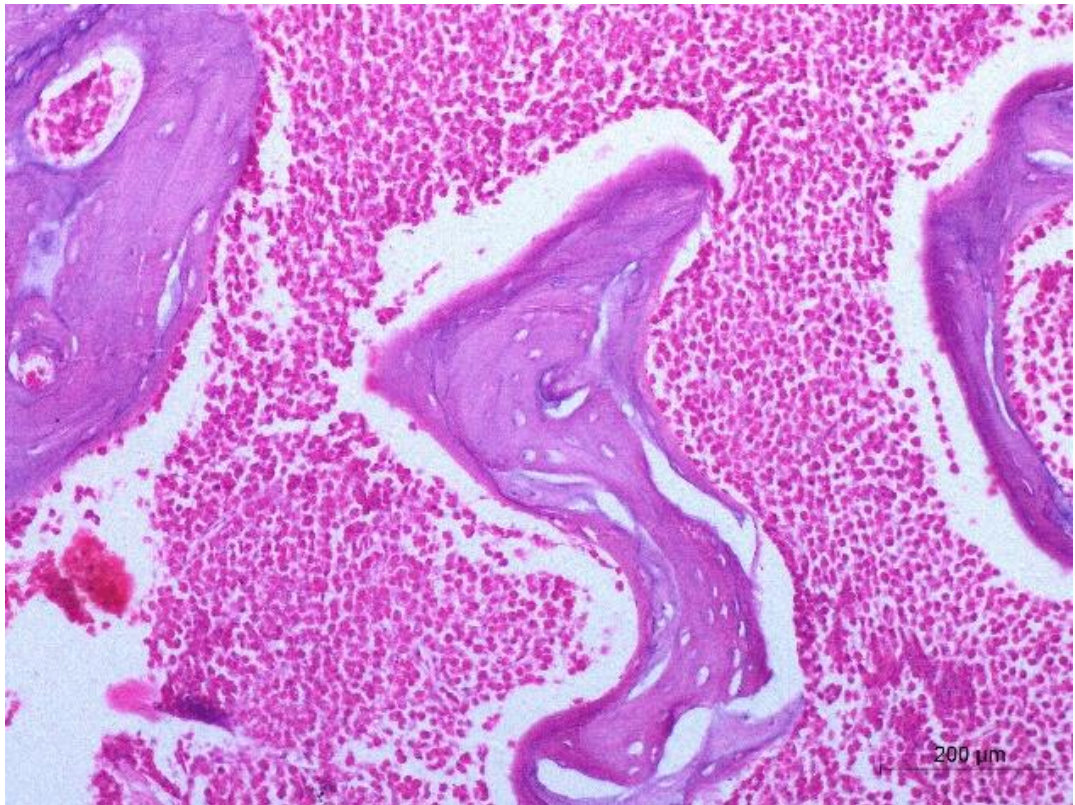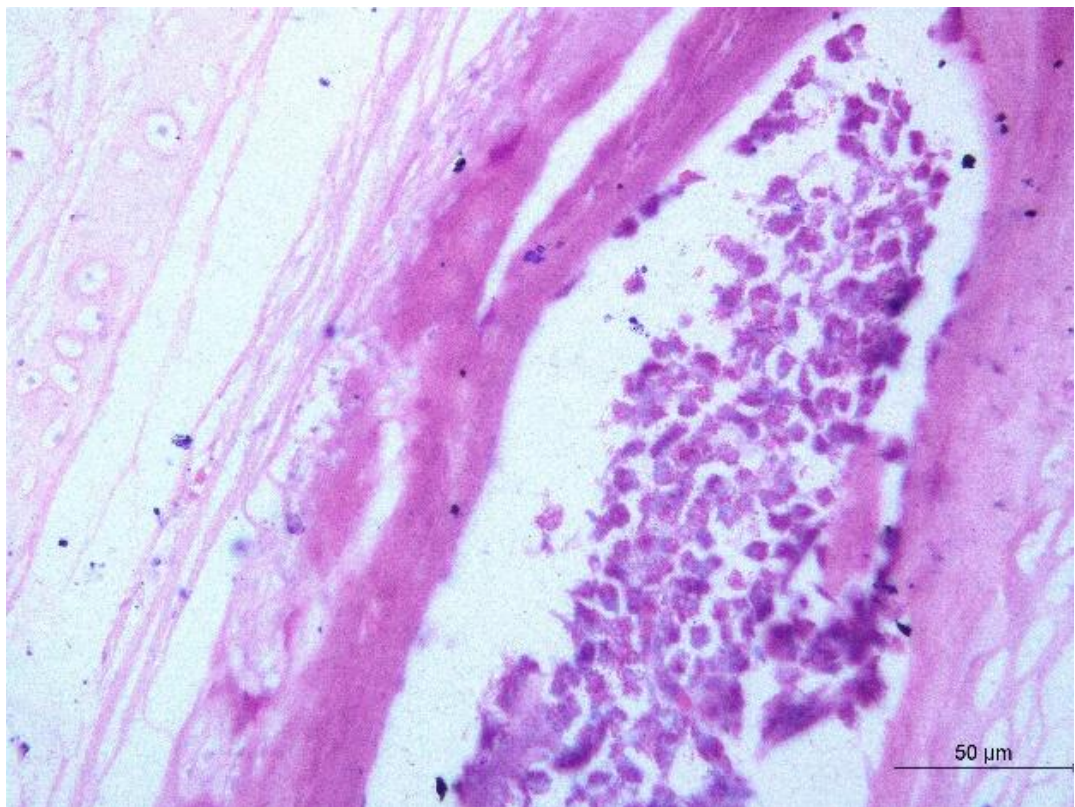



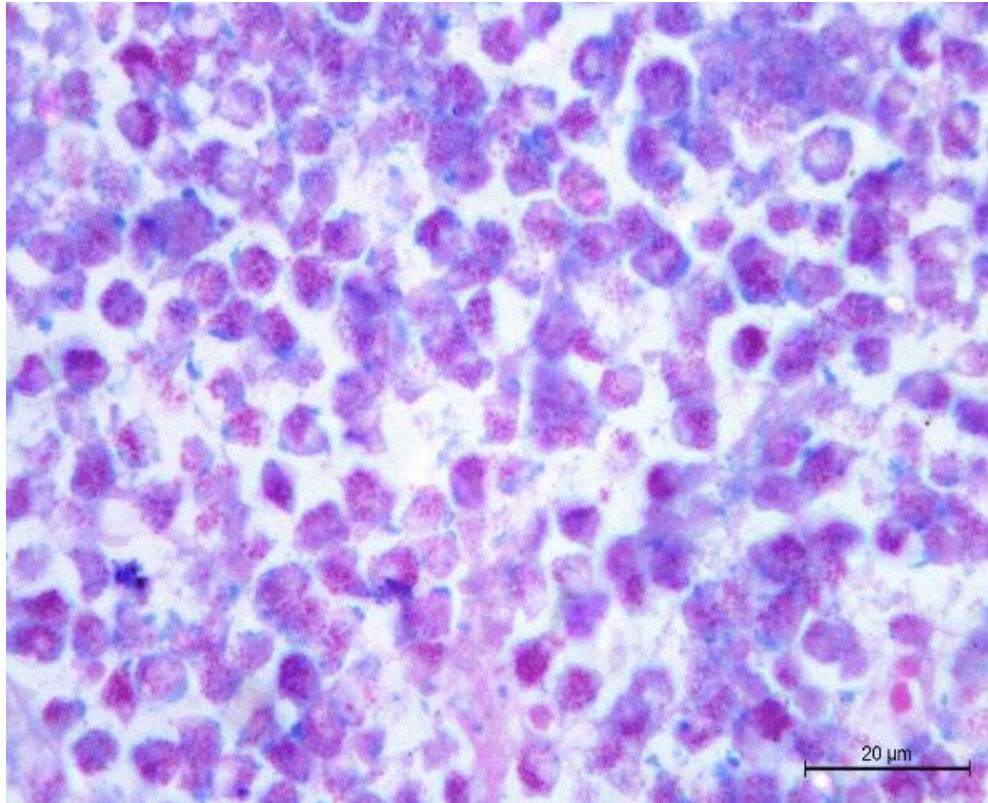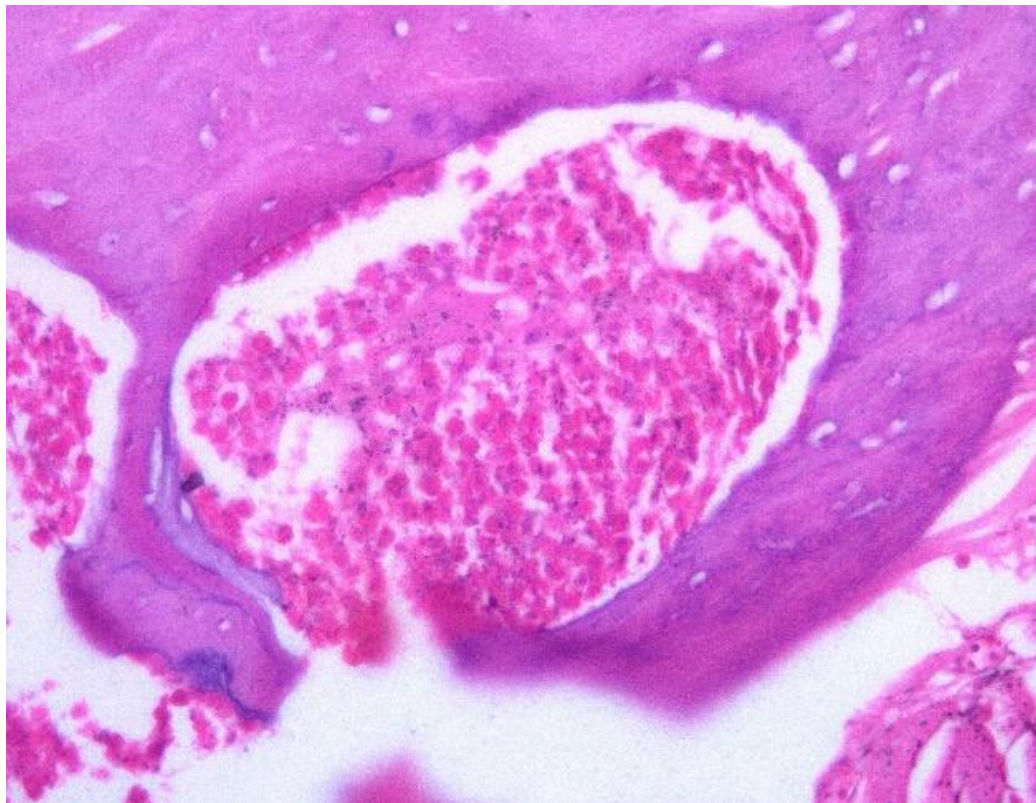



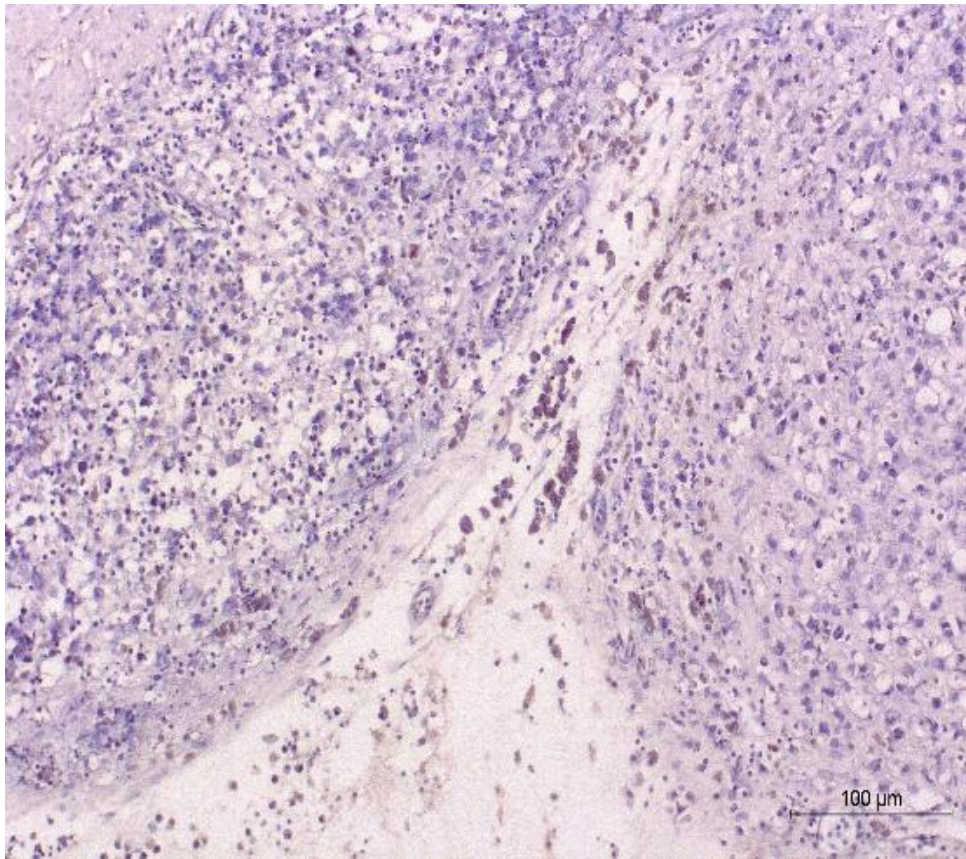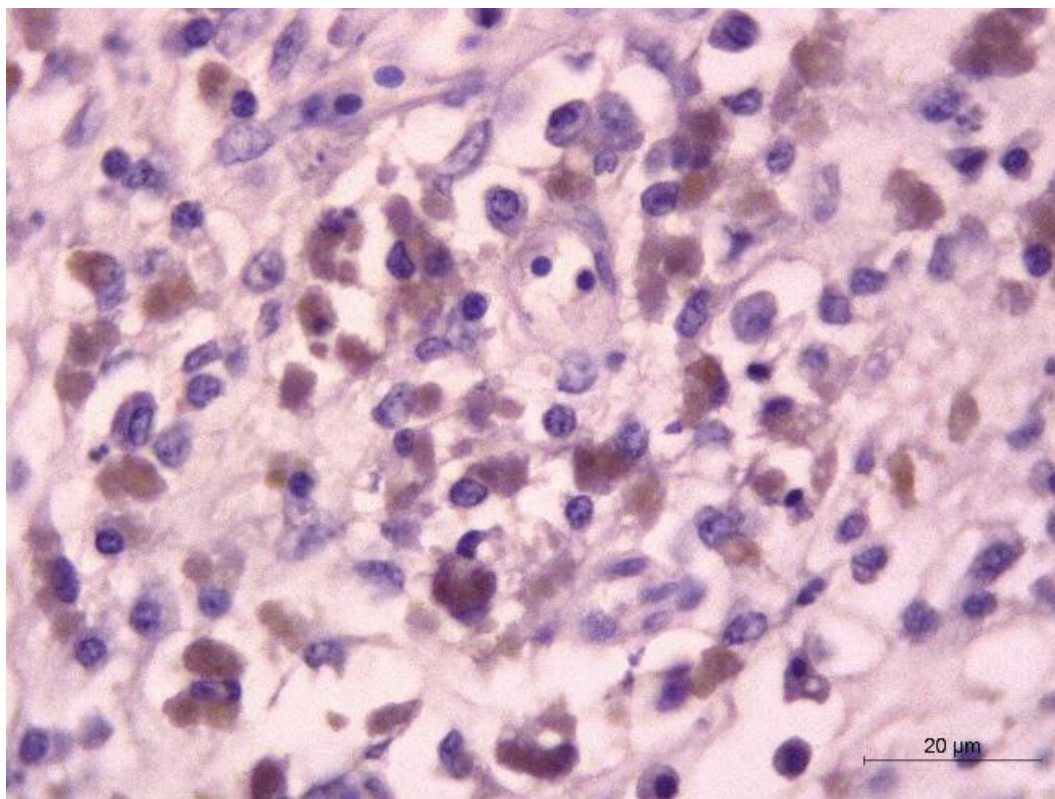



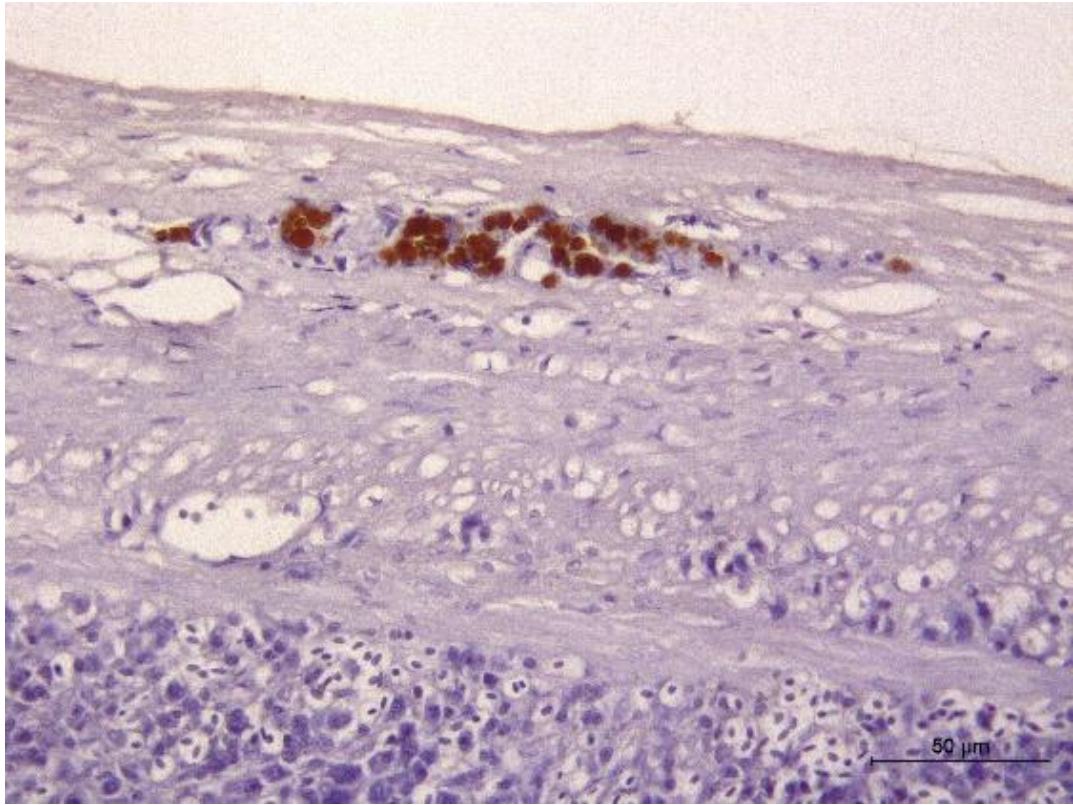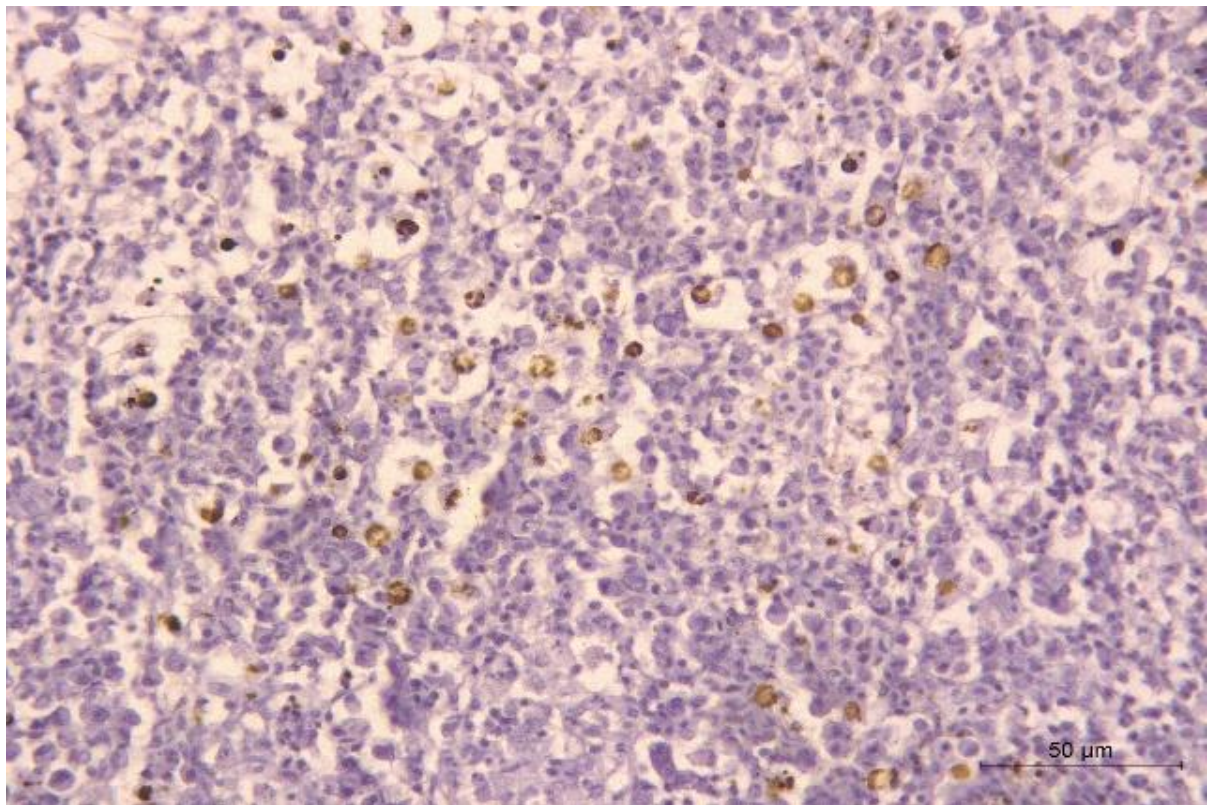



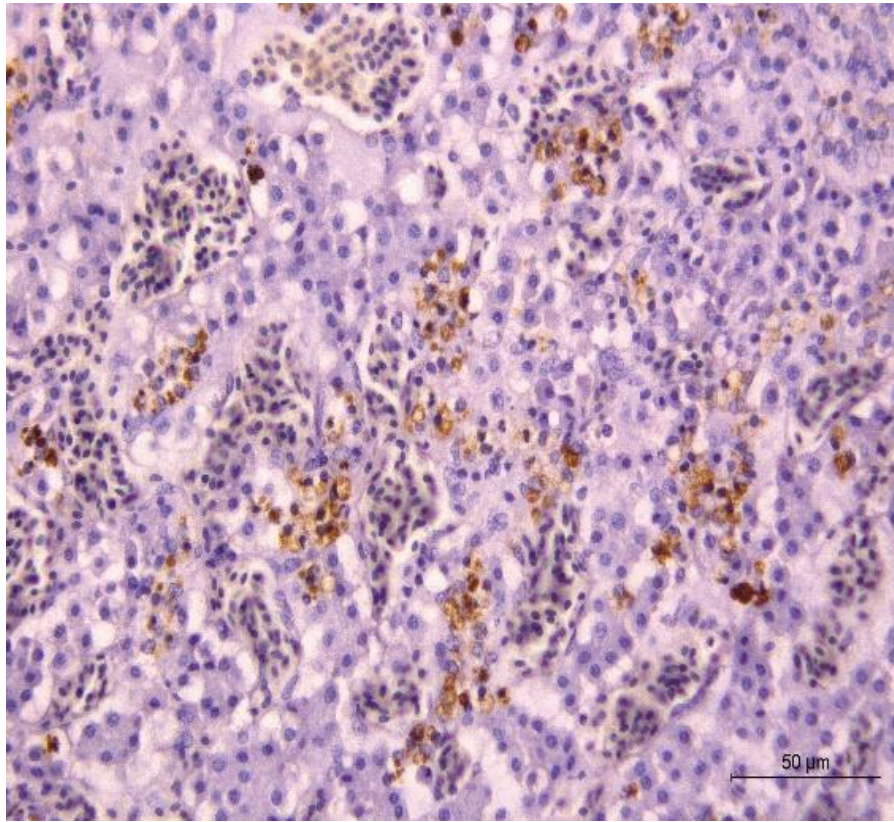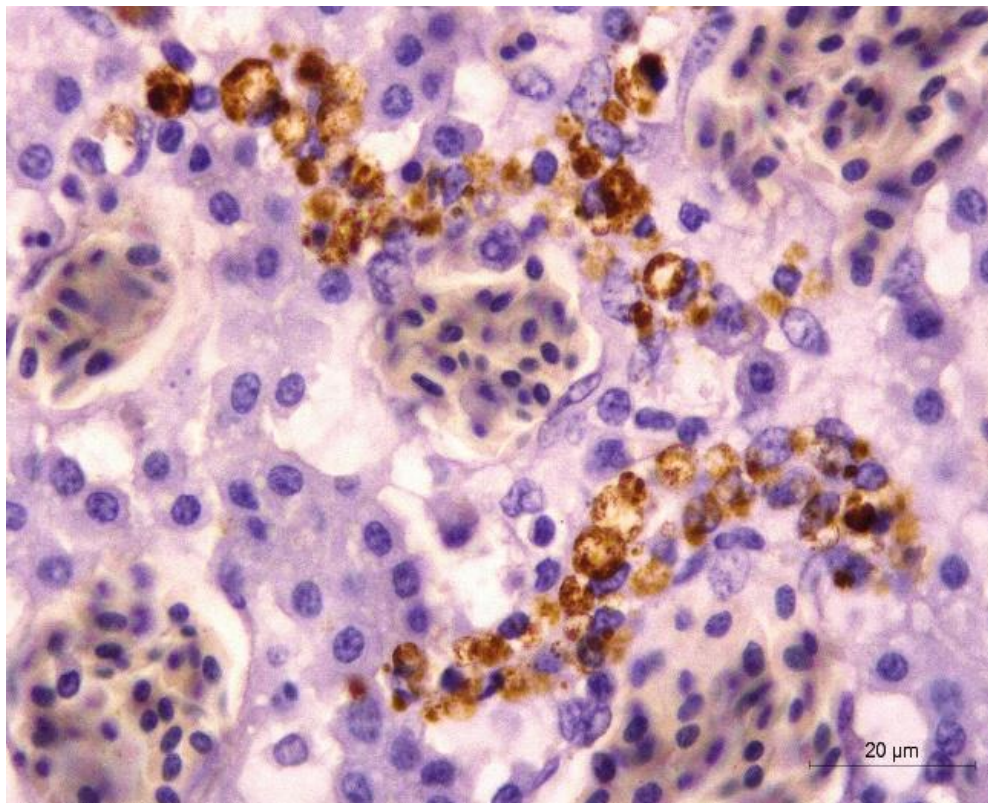



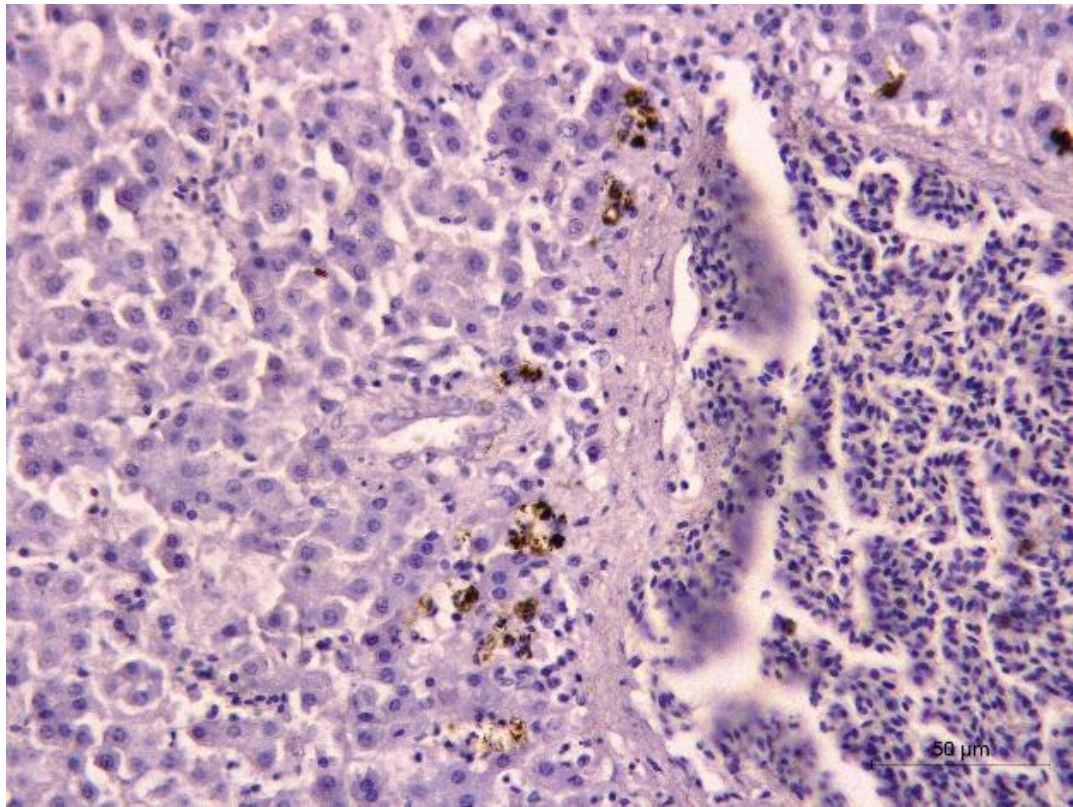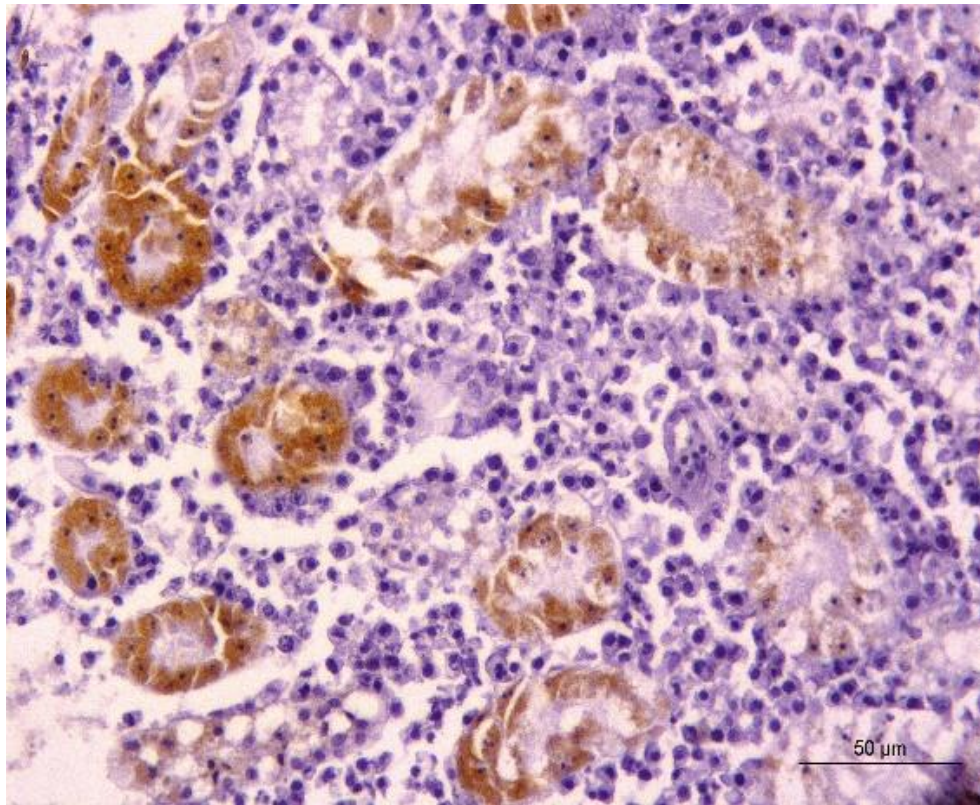



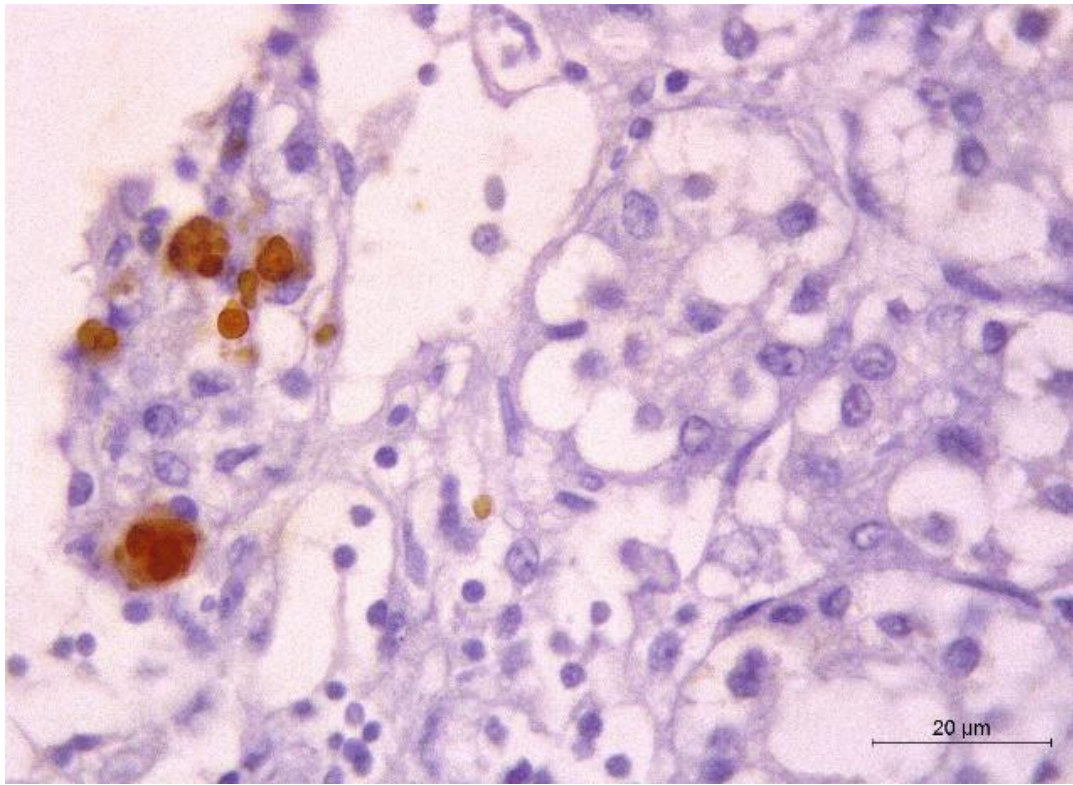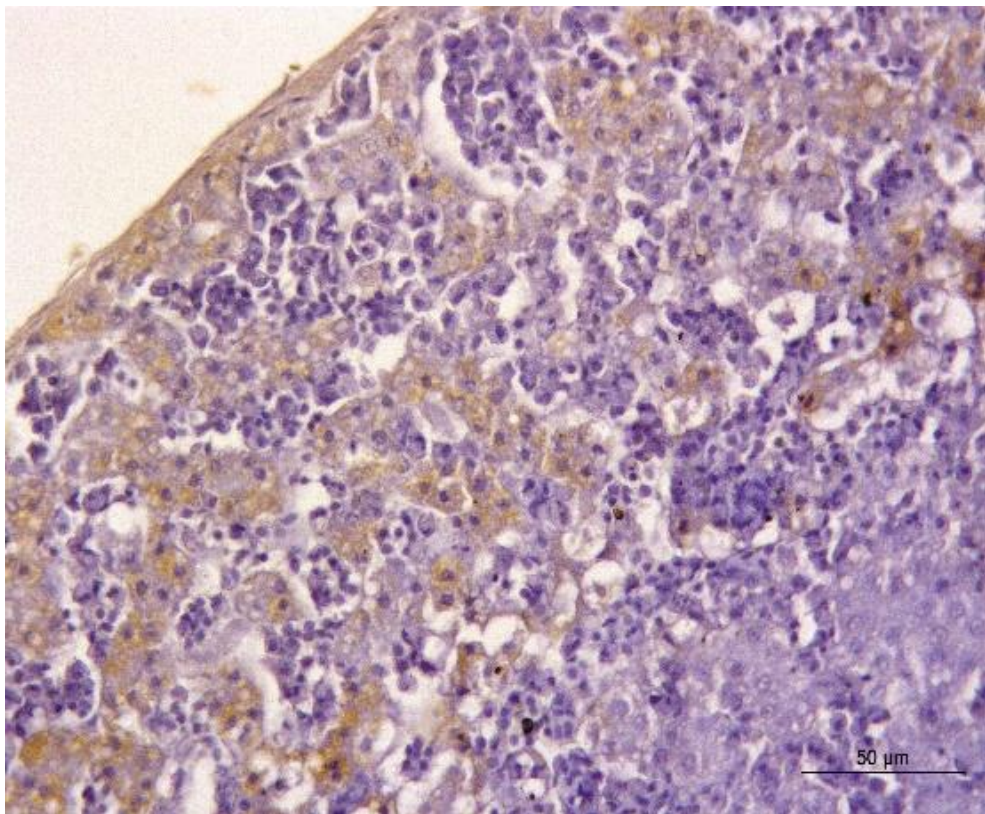

Supplement: MOESM2 [file 26963542]
